# Supplementary material
Source: PubMed Central journal article supplement (PMC4807467)
Supplement: IAI.00990-15_zii999091646so1.pdf [file IAI.00990-15_zii999091646so1.pdf]

## Supplementary Data

**Figure 1.** Gene expression of Th1 cytokines in secondary *Hb* infection in WT and IL-13R $\alpha$ 1KO mice

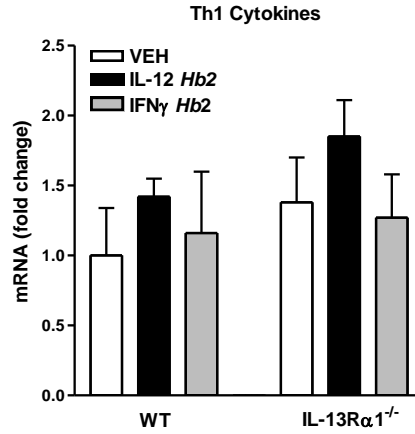

**Table 1.** Gene expression of M<sub>3</sub>R, 5HT<sub>2A</sub>, and PAR<sub>1</sub> in secondary *Hb* infection in WT and IL-13R $\alpha$ 1KO mice

|                                              | M <sub>3</sub> R   | 5HT <sub>2A</sub> | PAR <sub>1</sub> |
|----------------------------------------------|--------------------|-------------------|------------------|
| <b>WT Veh</b>                                | 1 ± 0.1            | 1 ± 0.2           | 1 ± 0.1          |
| <b>WT <i>Hb2</i></b>                         | 4.5 ± 0.7*         | 6.9 ± 1.3*        | 2 ± 0.3*         |
| <b>IL13R<math>\alpha</math>1KO Veh</b>       | 1.48±0.25          | 0.91±0.24         | 1±0.16           |
| <b>IL13R<math>\alpha</math>1KO<i>Hb2</i></b> | 2.11 ± 0.23 $\phi$ | 2.13±0.18* $\phi$ | 1.23±0.048       |

\*p<0.05 when compared to its own vehicle ;  $\phi$ p<0.05 when compared to WT-*Hb2*

**Table 2.** Gene expression of claudin-12, claudin-15, and CFTR in secondary *Hb* infection in WT and IL-13R $\alpha$ 1KO mice

|                                              | claudin-12 | claudin-15 | CFTR       |
|----------------------------------------------|------------|------------|------------|
| <b>WT Veh</b>                                | 1.00±0.04  | 1.00±0.21  | 1.0±0.2    |
| <b>WT <i>Hb2</i></b>                         | 0.76±0.14  | 0.54±0.17  | 2.51±0.45  |
| <b>IL13R<math>\alpha</math>1KO Veh</b>       | 1.05±0.06  | 1.04±0.12  | 1.48±0.53  |
| <b>IL13R<math>\alpha</math>1KO<i>Hb2</i></b> | 1.26±0.18  | 0.75±0.05  | 4.94±1.88* |

\*p<0.05 when compared to its own vehicle
